# Supplementary material for: Gestational deltamethrin exposure increases susceptibility to post-traumatic epilepsy in offspring and attenuates the alleviating effects of dietary curcumin
Source: Research Square preprint supplement (doi:10.21203/rs.3.rs-7935507/v1), 2026-02-09
Supplement: Supplementary file 1 [file b7084c41a31e2e447648971e.docx]

# Supplementary Table S1. GFAP and Iba1 Expression (Mean ± SEM)

GFAP and Iba1 immunoreactivity were quantified in cortical sections across experimental groups. Values are presented as Mean ± SEM. GFAP reflects astrocytic activation, while Iba1 reflects microglial activation. Direct comparisons between GFAP and Iba1 are not biologically meaningful but presenting them side by side allows evaluation of parallel glial responses across groups.

| Group | GFAP (Mean ± SEM) | Iba1 (Mean ± SEM) |
| --- | --- | --- |
| Saline | 2.77 ± 0.09 | 1.33 ± 0.11 |
| Epileptic | 9.61 ± 0.18 | 9.31 ± 0.16 |
| DLT+Epi | 16.61 ± 0.12 | 13.74 ± 0.50 |
| Epi+Cur | 5.43 ± 0.02 | 4.70 ± 0.32 |
| DLT+Epi+Cur | 8.64 ± 0.20 | 7.48 ± 0.22 |
